# Supplementary material
Source: Springer Nature journal article supplement (https://www.springermedizin.de/resource/supplementary/12889_2010_3380_MOESM4_ESM.pdf/9488922)
Supplement: MOESM4 [file 9488922]

**Table 4 - Regression coefficients in their exponential form as odds ratios (OR) and their 95%-confidence intervals (CI) for the models with the best fit for suicidal thoughts and suicide attempts (model 3 for both). For the YSR scales the OR is the ratio of the odds for one point of increase in the raw score.**

| Coefficient                 | suicidal thoughts |               | suicide attempts |               |
|-----------------------------|-------------------|---------------|------------------|---------------|
|                             | OR                | CI            | OR               | CI            |
| Female gender               | 1.454             | 1.179 – 1.794 | 1.532            | 1.179 – 1.990 |
| YSR 1: Withdrawn            | 1.005             | 0.956 – 1.057 | 0.961            | 0.905 – 1.021 |
| YSR 2: Somatic complaints   | 1.049             | 1.012 – 1.088 | 1.066            | 1.023 – 1.111 |
| YSR 3: Anxious/depressed    | 1.298             | 1.259 – 1.338 | 1.195            | 1.156 – 1.235 |
| YSR 4: Social problems      | 0.880             | 0.833 – 0.929 | 0.885            | 0.828 – 0.945 |
| YSR 5: Thought problems     | 1.086             | 1.038 – 1.137 | 1.062            | 1.010 – 1.117 |
| YSR 6: Attention problems   | 0.975             | 0.933 – 1.019 | 1.018            | 0.966 – 1.073 |
| YSR 7: Delinquent behaviour | 1.210             | 1.168 – 1.253 | 1.171            | 1.125 – 1.218 |
| YSR 8: Aggressive behaviour | 0.982             | 0.960 – 1.005 | 1.009            | 0.982 – 1.036 |
